# Supplementary material for: Restoring Mitochondrial Function: A Small Molecule-mediated Approach to Enhance Glucose Stimulated Insulin Secretion in Cholesterol Accumulated Pancreatic beta cells
Source: PubMed Central journal article supplement (PMC4901343; doi:10.1038/srep27513), 2016-06-10
Supplement: srep27513-s1.pdf [file srep27513-s1.pdf]

## **Supplementary Information**

### **Title:**

**Restoring Mitochondrial Function: A Small molecule Mediated Approach to Enhance Glucose Stimulated Insulin Secretion in Cholesterol Accumulated Pancreatic beta cells.**

### **Authors:**

Suman Asalla<sup>1,2</sup>, Shravan Babu Girada<sup>1</sup>, Ramya S.Kuna<sup>1</sup>, Debabrata Chowdhury, Bhaskar Kandagatla<sup>1</sup>, Srinivas Oruganti<sup>1</sup>, Utpal Bhadra<sup>3</sup>, Manika Pal Bhadra<sup>4</sup>, Shasi Vardhan Kalivendi<sup>4</sup>, Swetha Pavani Rao<sup>4</sup>, Anupama Row<sup>5</sup>, Ibrahim A<sup>6</sup>, Partha Pratim Ghosh<sup>7</sup>, Prasenjit Mitra<sup>1\*</sup>

<sup>1</sup>Dr. Reddy's Institute of Life Sciences, University of Hyderabad Campus, Gachibowli, Hyderabad, Telengana, India 500046

<sup>2</sup> Dept. of Biochemistry, School of Life Sciences, University of Hyderabad, Gachibowli, Hyderabad, Telengana, India 500046.

<sup>3</sup> Center of Cellular and Molecular Biology, Habsiguda, Uppal Road, Hyderabad, India, 500007

<sup>4</sup> Indian Institute of Chemical Technology, Uppal Road, Tarnaka, Telengana, Hyderabad, India, 500007.

<sup>5</sup> University of Hyderabad Health Center, University of Hyderabad, Gachibowli, Hyderabad, Telengana, India 500046.

<sup>6</sup> Department of Biochemistry, National Institute of Nutrition, Hyderabad 500007, India

<sup>7</sup> Microsoft India (R&D) Pvt.Ltd, Gachibowli, Hyderabad, Telengana, India 500032

### **Corresponding Author\*:**

Prasenjit Mitra.

Principal Scientist, Biology,

Dr.Reddy's Institute of Life Sciences,

University of Hyderabad Campus, Gachibowli, Hyderabad, Telengana 500046, India

Phone: 91-4066571500 Fax: 91-4066571581, E mail: [prasenjit.mitra01604@gmail.com](mailto:prasenjit.mitra01604@gmail.com);  
[prasenjitm@drils.org](mailto:prasenjitm@drils.org)

**Supplementary Figure1a:**

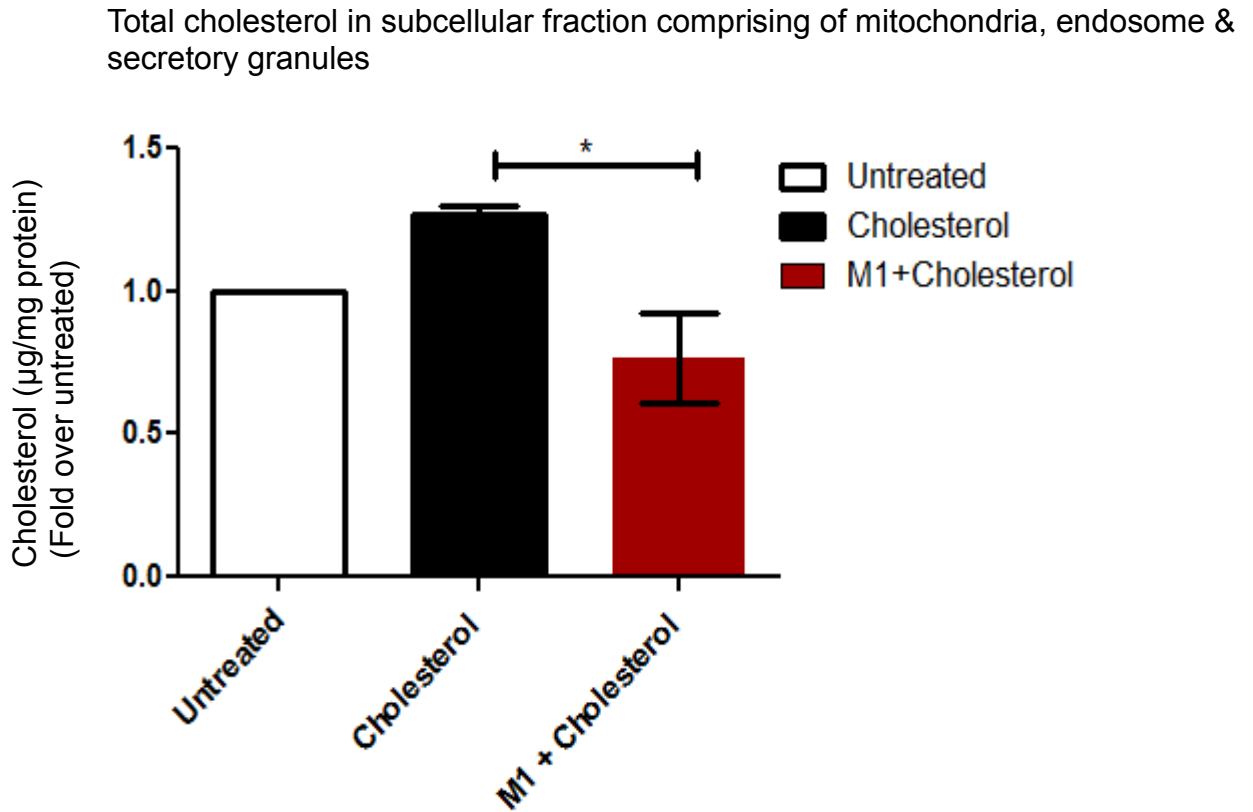

**Supplementary Figure1a:** Estimation of esterified cholesterol in subcellular fraction comprised of mitochondria, secretory granules and endosomes in untreated and cholesterol exposed pancreatic beta cells with or without the pre-treatment of small molecule M1. Sub-cellular fractionation was carried out following standard protocols and total cholesterol was extracted and measured through colorimetric assay. The normalized data measured as  $\mu\text{g}/\text{mg}$  protein were expressed as fold over untreated control and presented as mean  $\pm$  SEM of 3 independent experiments.

### Supplementary Fig 1b (i):

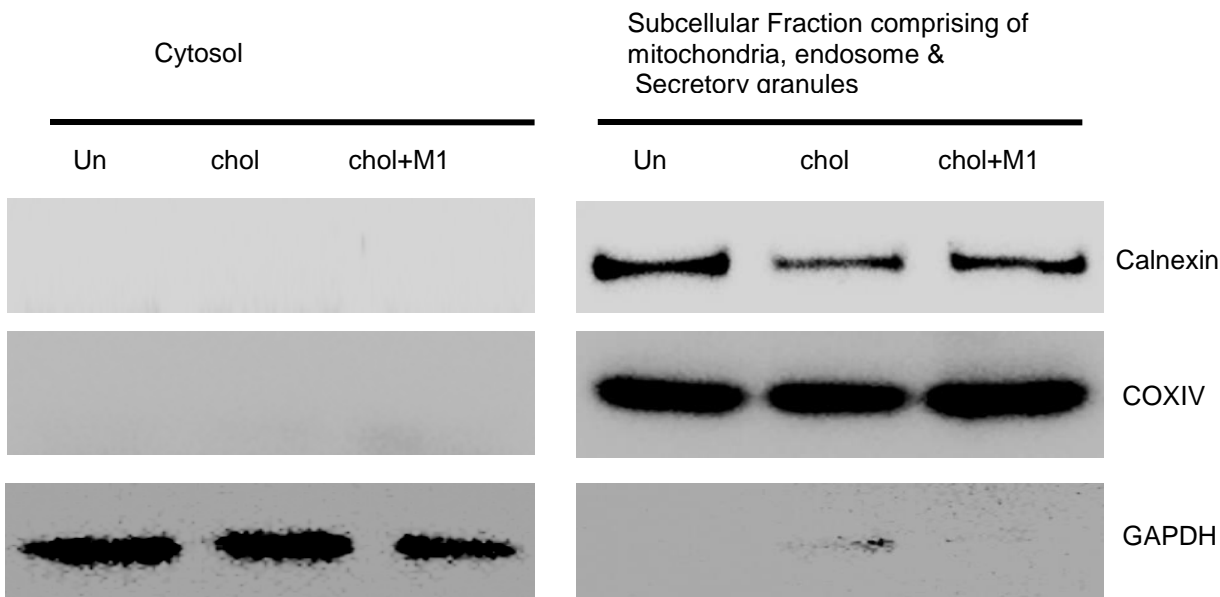

### Supplementary Fig 1b (ii)

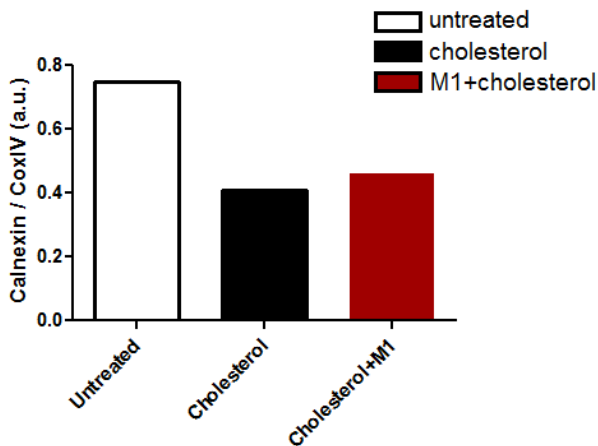

Supplementary Fig 1b: Western blotting of cytosolic and subcellular fraction comprised of mitochondria, secretory granules and endosomes isolated from untreated and cholesterol exposed pancreatic beta cells with or without the pre-treatment of small molecule M1. (i). Cytochrome oxidase IV (Cox IV) served as mitochondrial marker, Calnexin served as marker for rough ER and mitochondrial associated membrane (MAM), GAPDH serves as marker for cytosolic fractions. Densitometry showing the ratio of Calnexin: Cox IV (ii) is indicative of MAM presence in mitochondrial fractions of untreated and cholesterol enriched pancreatic beta cells with or without the pre-treatment with small molecule M1.

Supplementary Fig 1b (iii)

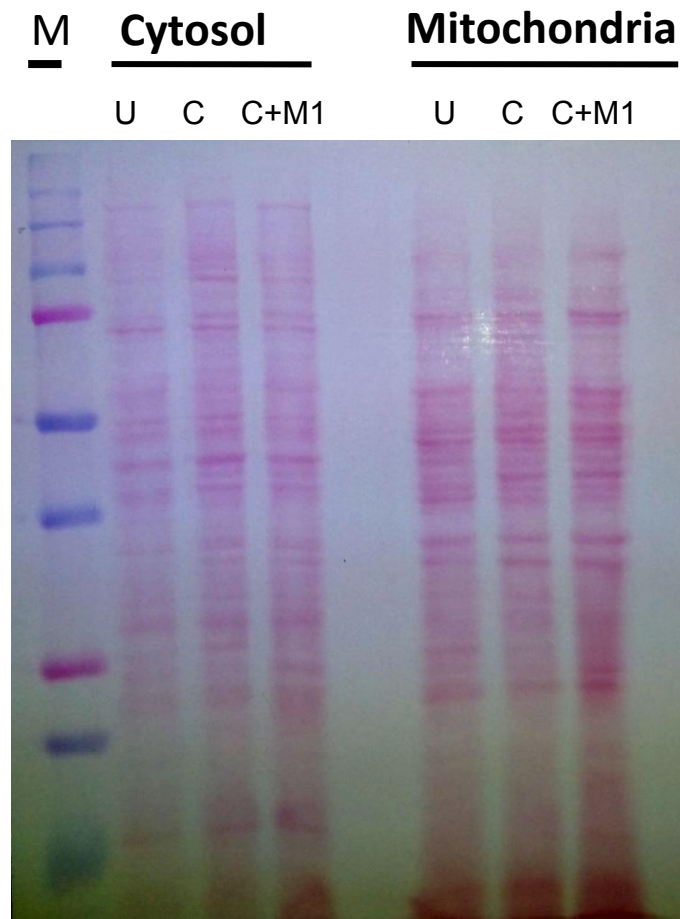

Supplementary Fig 1b(ii): Ponceau S staining depicting equal protein loading of untreated, cholesterol treated and cholesterol +M1 treated samples (cytosolic and mitochondrial fractions) that are subjected to western blotting with antibodies against marker proteins to ascertain the purity of the subcellular fractions.

**Supplementary Figure 2:**

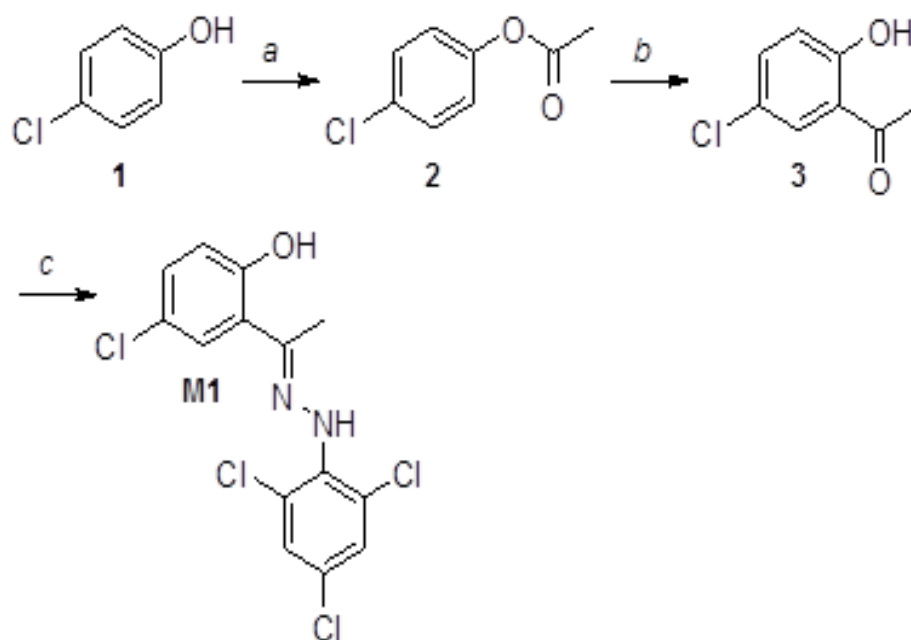

**Supplementary Fig 2:** Synthesis of 4-chloro-2-(1-(2-(2,4,6-trichlorophenyl)hydrazono)ethyl)phenol (**M1**) Reagents and conditions. (a)  $\text{AcCl}$ ,  $\text{AlCl}_3$ ,  $\text{CH}_2\text{Cl}_2$ ,  $0^\circ\text{C}$ –rt., 4h; (b)  $\text{Tf}_2\text{O}$ ,  $80^\circ\text{C}$ , 16h; (c) 1,3,5-Trichlorophenylhydrazine,  $\text{AcOH}$ ,  $\text{EtOH}$ ,  $80^\circ\text{C}$ , 1h. . 4-chlorophenyl acetate (**2**) obtained from acetylation of p-chlorophenol (**1**), was transformed to acetophenone (**3**) via  $\text{Tf}_2\text{O}$  mediated Fries rearrangement. Hydrazone formation between (**3**) and 2,4,6-(trichlorophenyl)hydrazine afforded convenient generation of **M1**

Supplementary Fig 3:

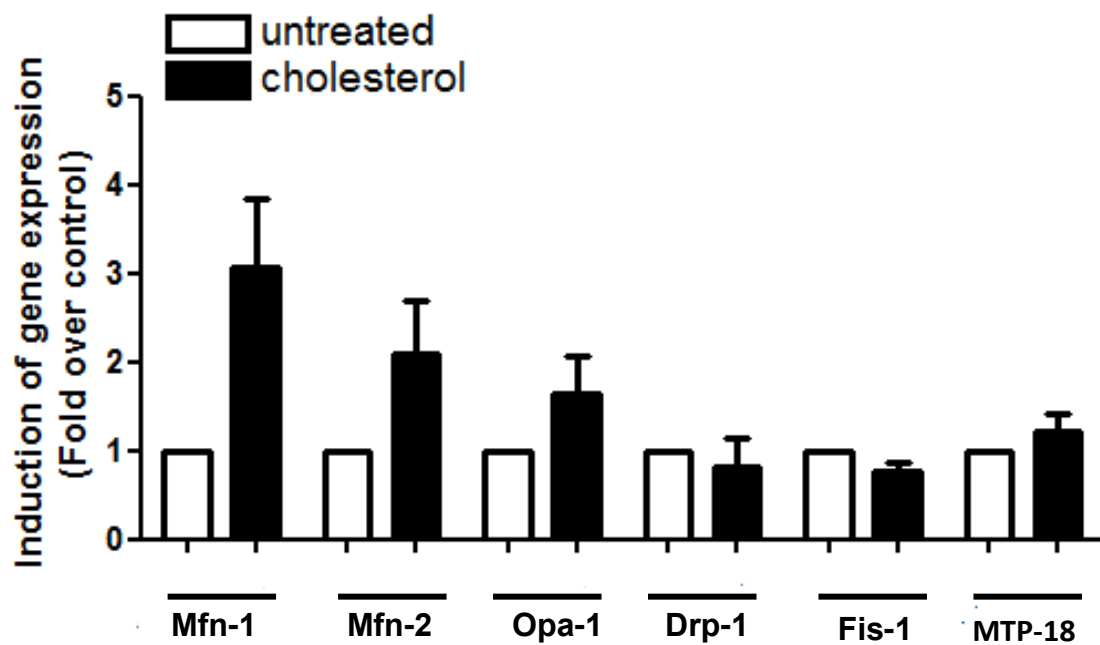

Supplementary Fig 3: Relative abundance of mitochondrial fusion and fission genes in cholesterol accumulated pancreatic beta cells as measured using  $2^{-\Delta\Delta CT}$  method using GAPDH as invariant reference.

**Supplementary Table 1**

| Patient code | FBS (mg/dL) | insulin(IU) | FH | Age(yrs) | TC(mg/dL) | TGL(mg/dL) | HDL(mg/dL) | LDL(mg/dL) |
|--------------|-------------|-------------|----|----------|-----------|------------|------------|------------|
| A1           | 114         | 18          | 0  | 48       | 133       | 75         | 50         | 68         |
| B1           | 88          | 23          | 1  | 50       | 165       | 77         | 34         | 115        |
| B2           | 78          | 23          | 1  | 39       | 209       | 98         | 41         | 148        |
| A3           | 115         | 45          | 1  | 46       | 192       | 110        | 39         | 131        |
| A4           | 104         | 28          | 0  | 40       | 209       | 88         | 43         | 145        |
| A5           | 100         | 13          | 1  | 42       | 155       | 66         | 36         | 105        |
| A6           | 108         | 43          | 1  | 52       | 216       | 65         | 34         | 169        |
| B3           | 95          | 11          | 1  | 54       | 230       | 134        | 46         | 157        |
| B4           | 92          | 16          | 1  | 41       | 168       | 118        | 42         | 102        |
| A7           | 117         | 51          | 1  | 50       | 230       | 129        | 42         | 162        |
| B5           | 135         | 34          | 0  | 49       | 235       | 147        | 46         | 159        |
| A8           | 106         | 16          | 1  | 61       | 125       | 49         | 40         | 75         |
| B6           | 148         | 90          | 1  | 52       | 209       | 120        | 34         | 151        |
| B7           | 130         | 3           | 1  | 58       | 148       | 132        | 34         | 132        |
| B8           | 310         | 54          | 1  | 48       | 192       | 87         | 35         | 139        |
| A9           | 112         | 27          | 0  | 53       | 165       | 110        | 35         | 108        |
| B9           | 237         | 64          | 1  | 55       | 240       | 290        | 38         | 144        |
| B10          | 126         | 12.5        | 1  | 30       | 125       | 75         | 31         | 79         |
| A10          | 101         | 22          | 0  | 50       | 150       | 88         | 34         | 98         |
| B11          | 171         | 24          | 1  | 38       | 195       | 112        | 40         | 132        |
| B12          | 128         | 60          | 0  | 43       | 225       | 132        | 39         | 153        |
| A11          | 102         | 0           | 1  | 31       | 186       | 90         | 38         | 130        |
| B13          | 285         | 54          | 1  | 57       | 182       | 98         | 32         | 130        |
| B14          | 234         | 11          | 1  | 38       | 215       | 124        | 37         | 153        |
| B15          | 137         | 11          | 0  | 46       | 254       | 280        | 46         | 152        |
| A12          | 108         | 0           | 1  | 42       | 171       | 62         | 29         | 129        |
| A13          | 104         | 0           | 1  | 50       | 270       | 170        | 47         | 189        |
| B16          | 205         | 0           | 1  | 35       | 182       | 73         | 34         | 136        |
| B17          | 128         | 6           | 0  | 58       | 187       | 82         | 34         | 136        |
| B18          | 148         | 11          | 1  | 45       | 217       | 139        | 40         | 149        |
| B19          | 348         | 24          | 1  | 55       | 272       | 154        | 43         | 198        |
| A14          | 100         | 46          | 1  | 54       | 207       | 118        | 44         | 139        |
| B20          | 73          | 3.3         | 0  | 20       | 214       | 160        | 36         | 146        |
| B21          | 163         | 0           | 0  | 50       | 94        | 51         | 32         | 51         |
| B22          | 186         | 25          | 1  | 47       | 180       | 216        | 35         | 101        |
| B23          | 128         | 31          | 1  | 46       | 187       | 158        | 32         | 123        |
| A15          | 104         | 33          | 0  | 49       | 180       | 76         | 32         | 132        |
| B24          | 338         | 22          | 0  | 55       | 190       | 98         | 35         | 135        |
| B25          | 182         | 19          | 0  | 58       | 159       | 76         | 34         | 125        |
| B26          | 150         | 25          | 0  | 54       | 190       | 119        | 36         | 130        |

|     |     |    |   |    |     |     |    |     |
|-----|-----|----|---|----|-----|-----|----|-----|
| A16 | 117 | 3  | 0 | 50 | 240 | 116 | 43 | 173 |
| B27 | 98  | 9  | 0 | 56 | 182 | 85  | 34 | 131 |
| A17 | 102 | 4  | 1 | 41 | 162 | 115 | 37 | 102 |
| A18 | 125 | 15 | 1 | 53 | 178 | 200 | 40 | 98  |
| B28 | 144 | 0  | 0 | 55 | 226 | 298 | 39 | 127 |
| B29 | 68  | 0  | 1 | 43 | 226 | 211 | 42 | 141 |
| A19 | 117 | 22 | 1 | 39 | 190 | 120 | 33 | 133 |
| B30 | 97  | 0  | 0 | 60 | 159 | 80  | 36 | 107 |
| A20 | 115 | 9  | 1 | 57 | 226 | 155 | 39 | 156 |
| A21 | 117 | 42 | 1 | 55 | 195 | 92  | 38 | 138 |
| B31 | 212 | 0  | 1 | 52 | 215 | 132 | 34 | 154 |
| B32 | 350 | 3  | 1 | 52 | 258 | 166 | 39 | 185 |
| B33 | 172 | 24 | 1 | 55 | 172 | 88  | 32 | 122 |
| B34 | 192 | 7  | 0 | 58 | 190 | 78  | 39 | 135 |
| B35 | 172 | 38 | 1 | 57 | 192 | 101 | 33 | 138 |
| B36 | 122 | 17 | 1 | 49 | 175 | 119 | 39 | 112 |
| B37 | 170 | 21 | 1 | 40 | 190 | 128 | 41 | 123 |
| A22 | 119 | 23 | 0 | 58 | 190 | 112 | 37 | 130 |
| B38 | 153 | 11 | 1 | 47 | 185 | 116 | 35 | 126 |
| B39 | 203 | 1  | 1 | 52 | 192 | 127 | 42 | 124 |
| B40 | 75  | 1  | 1 | 54 | 221 | 140 | 43 | 150 |
| A21 | 115 | 80 | 0 | 54 | 158 | 132 | 32 | 99  |
| B41 | 90  | 7  | 0 | 49 | 175 | 121 | 40 | 110 |
| B42 | 136 | 18 | 0 | 50 | 177 | 88  | 34 | 125 |
| B43 | 220 | 0  | 0 | 37 | 190 | 132 | 43 | 120 |
| B44 | 161 | 5  | 1 | 60 | 240 | 152 | 34 | 145 |
| B45 | 126 | 4  | 0 | 45 | 180 | 119 | 42 | 167 |
| A22 | 75  | 19 | 1 | 55 | 188 | 119 | 30 | 126 |
| A23 | 139 | 18 | 0 | 59 | 158 | 79  | 39 | 125 |
| A24 | 166 | 11 | 1 | 73 | 258 | 211 | 32 | 110 |
| A25 | 112 | 8  | 0 | 54 | 188 | 162 | 33 | 122 |
| A26 | 85  | 0  | 0 | 44 | 190 | 117 | 34 | 132 |
| A27 | 170 | 36 | 0 | 49 | 208 | 89  | 40 | 150 |
| A28 | 250 | 1  | 0 | 53 | 180 | 139 | 41 | 111 |
| A29 | 77  | 0  | 0 | 51 | 188 | 110 | 39 | 127 |
| A30 | 75  | 64 | 0 | 42 | 208 | 119 | 43 | 141 |
| A31 | 156 | 0  | 1 | 56 | 190 | 101 | 38 | 131 |
| A32 | 103 | 6  | 1 | 52 | 188 | 101 | 39 | 128 |
| A33 | 385 | 38 | 1 | 50 | 176 | 89  | 39 | 119 |
| A34 | 76  | 91 | 1 | 43 | 180 | 91  | 34 | 127 |
| A35 | 85  | 26 | 0 | 58 | 170 | 68  | 35 | 121 |
| A36 | 102 | 6  | 1 | 46 | 148 | 71  | 33 | 108 |
| A37 | 75  | 18 | 0 | 23 | 180 | 88  | 39 | 123 |
| A38 | 80  | 9  | 1 | 22 | 170 | 69  | 30 | 126 |
| A39 | 91  | 0  | 1 | 28 | 231 | 77  | 40 | 175 |
| A40 | 75  | 1  | 1 | 34 | 188 | 112 | 42 | 123 |



|     |     |      |   |    |     |     |    |     |
|-----|-----|------|---|----|-----|-----|----|-----|
| A41 | 88  | 11   | 1 | 45 | 210 | 169 | 43 | 133 |
| A42 | 84  | 13   | 1 | 24 | 155 | 72  | 33 | 107 |
| A43 | 95  | 22   | 1 | 38 | 305 | 197 | 48 | 217 |
| A44 | 72  | 56   | 1 | 42 | 192 | 107 | 32 | 138 |
| A45 | 82  | 13   | 0 | 35 | 207 | 110 | 32 | 153 |
| A46 | 62  | 9    | 0 | 36 | 121 | 69  | 32 | 75  |
| A47 | 65  | 0    | 1 | 22 | 162 | 66  | 31 | 117 |
| A48 | 78  | 32   | 1 | 25 | 214 | 130 | 33 | 155 |
| A49 | 76  | 8    | 0 | 22 | 206 | 170 | 36 | 136 |
| A50 | 71  | 12.5 | 1 | 26 | 199 | 126 | 29 | 144 |
| A51 | 72  | 8    | 0 | 24 | 143 | 118 | 38 | 81  |
| A52 | 76  | 0    | 0 | 24 | 190 | 80  | 32 | 142 |
| A53 | 103 | 91   | 1 | 36 | 188 | 92  | 37 | 132 |
| A54 | 92  | 20   | 1 | 41 | 190 | 74  | 38 | 137 |
| A55 | 92  | 70   | 1 | 58 | 154 | 96  | 30 | 104 |
| A56 | 92  | 13   | 1 | 51 | 180 | 72  | 39 | 126 |
| A57 | 88  | 10   | 1 | 37 | 170 | 92  | 34 | 117 |
| A58 | 80  | 0    | 1 | 35 | 176 | 150 | 33 | 113 |
| A59 | 106 | 15   | 0 | 46 | 188 | 395 | 43 | 66  |
| A60 | 69  | 0    | 0 | 18 | 144 | 117 | 32 | 88  |
| A61 | 66  | 0    | 0 | 24 | 195 | 92  | 29 | 147 |
| A62 | 83  | 7    | 0 | 24 | 221 | 75  | 42 | 164 |
| A63 | 76  | 8    | 0 | 24 | 192 | 144 | 31 | 132 |
| A64 | 71  | 0    | 0 | 24 | 202 | 170 | 42 | 126 |
| A65 | 81  | 8    | 0 | 33 | 180 | 117 | 37 | 119 |
| A66 | 75  | 13   | 0 | 19 | 190 | 192 | 37 | 114 |
| A67 | 75  | 1    | 0 | 18 | 173 | 109 | 35 | 116 |
| A68 | 74  | 11   | 0 | 24 | 198 | 142 | 40 | 129 |
| A69 | 70  | 0    | 0 | 45 | 267 | 126 | 48 | 193 |
| A70 | 73  | 0    | 0 | 23 | 143 | 70  | 38 | 91  |
| A71 | 125 | 19   | 0 | 44 | 224 | 110 | 39 | 163 |
| A72 | 90  | 56   | 0 | 55 | 295 | 150 | 48 | 217 |
| A73 | 71  | 8    | 0 | 18 | 136 | 52  | 25 | 100 |
| A74 | 70  | 8    | 0 | 19 | 156 | 79  | 39 | 101 |
| A75 | 67  | 21   | 0 | 20 | 129 | 59  | 31 | 86  |
| A76 | 62  | 22   | 0 | 27 | 176 | 88  | 30 | 128 |
| A77 | 80  | 8    | 0 | 23 | 202 | 102 | 32 | 149 |
| A78 | 89  | 11   | 0 | 24 | 199 | 139 | 37 | 132 |
| A79 | 88  | 5    | 0 | 26 | 170 | 88  | 32 | 120 |
| A80 | 72  | 10   | 0 | 47 | 192 | 78  | 39 | 137 |
| A81 | 95  | 13   | 0 | 52 | 172 | 65  | 39 | 120 |
| A82 | 87  | 3    | 0 | 59 | 180 | 101 | 35 | 124 |
| A83 | 79  | 3    | 0 | 61 | 210 | 128 | 39 | 145 |
| A84 | 76  | 0    | 0 | 52 | 156 | 98  | 39 | 97  |
| A85 | 82  | 15   | 0 | 45 | 219 | 128 | 41 | 150 |
| A86 | 73  | 3    | 0 | 30 | 180 | 81  | 43 | 120 |

|     |     |    |   |    |     |     |    |     |
|-----|-----|----|---|----|-----|-----|----|-----|
| A87 | 75  | 5  | 0 | 50 | 201 | 118 | 40 | 137 |
| A88 | 83  | 6  | 0 | 60 | 202 | 89  | 37 | 147 |
| A89 | 84  | 21 | 0 | 45 | 170 | 102 | 32 | 117 |
| A90 | 96  | 15 | 0 | 45 | 182 | 91  | 42 | 121 |
| A91 | 74  | 5  | 0 | 50 | 165 | 75  | 31 | 119 |
| A92 | 82  | 0  | 0 | 35 | 190 | 114 | 37 | 130 |
| A93 | 80  | 0  | 0 | 49 | 215 | 108 | 39 | 117 |
| A94 | 112 | 8  | 0 | 50 | 179 | 109 | 37 | 120 |
| A95 | 70  | 30 | 0 | 60 | 220 | 88  | 40 | 162 |
| A96 | 80  | 4  | 0 | 52 | 190 | 128 | 39 | 125 |
| A97 | 105 | 0  | 0 | 42 | 205 | 60  | 43 | 150 |
| A98 | 78  | 5  | 0 | 48 | 167 | 78  | 35 | 116 |

Supplementary Table 1: Description of Fasting Blood Sugar (FS), serum Lipid profile and family history of type 2 diabetes (FH) of volunteers assessed in this study. A volunteer whose parents suffer from type 2 diabetes was allotted a value of 1. A Volunteer with no family history of type 2 diabetes was allotted a value of 0.
